# Supplementary material for: Community factors and excess mortality in first wave of the COVID-19 pandemic
Source: bioRxiv or medRxiv preprint supplement (doi:10.1101/2020.11.19.20234849), 2020-11-22

**Davies *et al.* Community factors and excess mortality in first wave of the COVID-19 pandemic**

**Extended Data**

**Extended Data Table 1. Characteristics of the 6,791 Middle Super Output Areas in England.**

|                                                               | <b>Mean</b> | <b>Median</b> | <b>Range</b>   | <b>Inter-quartile range</b> |
|---------------------------------------------------------------|-------------|---------------|----------------|-----------------------------|
| Population                                                    | 8,288       | 7,992         | 2,224 – 24,795 | 6,853 – 9,338               |
| Population (M)                                                | 4,098       | 3,928         | 1,089 – 13,648 | 3,362 – 4,631               |
| Population (F)                                                | 4,191       | 4,058         | 1,135 – 11,147 | 3,476 – 4,714               |
| Population over 40 (M)                                        | 1,994       | 1,930         | 410 – 4,466    | 1,662 – 2,275               |
| Population over 40 (F)                                        | 2,155       | 2,089         | 286 – 4,808    | 1,788 – 2,470               |
| Area (km <sup>2</sup> )                                       | 19.2        | 3.04          | 0.294 – 1128   | 1.69 – 10.5                 |
| Baseline deaths (M), per 100,000 males over 40, 2015 – 2019   | 447         | 443           | 131 – 1,118    | 375 – 513                   |
| Baseline deaths (F), per 100,000 females over 40, 2015 – 2019 | 429         | 413           | 118 – 1,419    | 339 – 505                   |

M – male; F – female; km- kilometre.

**Extended Data Table 2. Characteristics of the study and comparison populations.**

|                                                           | <b>Comparison period<br/>(1 March – 31 May, 2015 – 2019)</b> | <b>Study period<br/>(1 March – 31 May 2020)</b> |                                                              |                                                                |
|-----------------------------------------------------------|--------------------------------------------------------------|-------------------------------------------------|--------------------------------------------------------------|----------------------------------------------------------------|
|                                                           | <b>Mean deaths per year (%)</b>                              | <b>Total deaths (%)</b>                         | <b>Deaths with COVID-19 as underlying cause of death (%)</b> | <b>Deaths with COVID-19 mentioned on death certificate (%)</b> |
| <b>Total</b>                                              | 121,358                                                      | 171,294                                         | 41,833                                                       | 44,666                                                         |
| <b>Sex</b>                                                |                                                              |                                                 |                                                              |                                                                |
| Male                                                      | 59,347 (48.9)                                                | 86,071 (50.2)                                   | 23,222 (55.5)                                                | 24,736 (55.4)                                                  |
| Female                                                    | 62,011 (51.1)                                                | 85,223 (49.8)                                   | 18,611 (44.5)                                                | 19,930 (44.6)                                                  |
| <b>Age</b>                                                |                                                              |                                                 |                                                              |                                                                |
| 40-59                                                     | 10,296 (8.48)                                                | 11,876 (6.93)                                   | 2,505 (5.99)                                                 | 2,728 (6.1)                                                    |
| 60-69                                                     | 14,287 (11.8)                                                | 17,763 (10.4)                                   | 4,074 (9.74)                                                 | 4,377 (9.8)                                                    |
| 70-79                                                     | 26,961 (22.2)                                                | 38,378 (22.4)                                   | 9,430 (22.5)                                                 | 10,133 (22.7)                                                  |
| 80+                                                       | 69,814 (57.5)                                                | 103,277 (60.3)                                  | 25,824 (61.7)                                                | 27,428 (61.4)                                                  |
| <b>Place of death</b>                                     |                                                              |                                                 |                                                              |                                                                |
| Hospital                                                  | 56,735 (46.8)                                                | 69,068 (40.3)                                   | 26,755 (64.0)                                                | 28,380 (63.5)                                                  |
| Care home                                                 | 27,123 (22.3)                                                | 52,112 (30.4)                                   | 12,598 (30.1)                                                | 13,281 (29.7)                                                  |
| Home                                                      | 28,294 (23.3)                                                | 40,678 (23.7)                                   | 1,776 (4.24)                                                 | 2,028 (4.54)                                                   |
| Hospice                                                   | 6,907 (5.69)                                                 | 6,348 (3.71)                                    | 382 (0.91)                                                   | 617 (1.38)                                                     |
| Other/elsewhere                                           | 2,299 (1.89)                                                 | 3,088 (1.80)                                    | 322 (0.77)                                                   | 360 (0.81)                                                     |
| <b>Population on income support (%)</b>                   |                                                              |                                                 |                                                              |                                                                |
| ≥ 0.80 to < 6.00                                          | 22,877 (18.9)                                                | 32,743 (19.1)                                   | 7,715 (18.4)                                                 | 8,251 (18.5)                                                   |
| ≥ 6.00 to < 8.79                                          | 25,047 (20.6)                                                | 34,341 (20.0)                                   | 7,603 (18.2)                                                 | 8,146 (18.2)                                                   |
| ≥ 8.79 to < 12.7                                          | 25,272 (20.8)                                                | 35,021 (20.4)                                   | 8,111 (19.4)                                                 | 8,690 (19.5)                                                   |
| ≥ 12.7 to < 18.8                                          | 24,435 (20.1)                                                | 34,561 (20.2)                                   | 9,045 (21.6)                                                 | 9,611 (21.5)                                                   |
| ≥ 18.8 to < 48.9                                          | 23,727 (19.6)                                                | 34,628 (20.2)                                   | 9,359 (22.4)                                                 | 9,968 (22.3)                                                   |
| <b>Population density (population per km<sup>2</sup>)</b> |                                                              |                                                 |                                                              |                                                                |
| ≥ 5.65 to < 456                                           | 26,569 (21.9)                                                | 35,011 (20.4)                                   | 6,641 (15.9)                                                 | 7,102 (15.9)                                                   |
| ≥ 456 to < 1,877                                          | 27,214 (22.4)                                                | 37,532 (21.9)                                   | 8,527 (20.4)                                                 | 9,112 (20.4)                                                   |
| ≥ 1,877 to < 3,445                                        | 25,429 (21.0)                                                | 35,538 (20.7)                                   | 8,619 (20.6)                                                 | 9,222 (20.6)                                                   |
| ≥ 3,445 to < 5,340                                        | 24,246 (20.0)                                                | 34,926 (20.4)                                   | 9,034 (21.6)                                                 | 9,672 (21.7)                                                   |
| ≥ 5,340 to < 29,000                                       | 17,900 (14.7)                                                | 28,287 (16.5)                                   | 9,015 (21.5)                                                 | 9,558 (21.4)                                                   |
| <b>Population non-White (%)</b>                           |                                                              |                                                 |                                                              |                                                                |
| ≥ 0.43 to < 2.10                                          | 28,373 (23.4)                                                | 36,559 (21.3)                                   | 6,896 (16.5)                                                 | 7,363 (16.5)                                                   |
| ≥ 2.10 to < 3.72                                          | 27,412 (22.6)                                                | 36,974 (21.6)                                   | 7,967 (19.0)                                                 | 8,563 (19.2)                                                   |
| ≥ 3.72 to < 8.28                                          | 25,513 (21.0)                                                | 34,834 (20.3)                                   | 8,044 (19.2)                                                 | 8,598 (19.2)                                                   |
| ≥ 8.28 to < 22.2                                          | 22,401 (18.5)                                                | 33,010 (19.3)                                   | 8,729 (20.9)                                                 | 9,323 (20.9)                                                   |
| ≥ 22.2 to < 94.4                                          | 17,659 (14.6)                                                | 29,917 (17.5)                                   | 10,197 (24.4)                                                | 10,819 (24.2)                                                  |
| <b>Overcrowded homes (%)</b>                              |                                                              |                                                 |                                                              |                                                                |
| ≥ 0.334 to < 1.65                                         | 26,425 (21.8)                                                | 35,553 (20.8)                                   | 7,332 (17.5)                                                 | 7,869 (17.6)                                                   |
| ≥ 1.65 to < 2.42                                          | 26,769 (22.1)                                                | 36,170 (21.1)                                   | 7,747 (18.5)                                                 | 8,314 (18.6)                                                   |
| ≥ 2.42 to < 3.67                                          | 26,564 (21.9)                                                | 36,282 (21.2)                                   | 8,353 (20.0)                                                 | 8,923 (20.0)                                                   |
| ≥ 3.67 to < 6.26                                          | 23,979 (19.8)                                                | 34,031 (19.9)                                   | 8,622 (20.6)                                                 | 9,209 (20.6)                                                   |

|                                                           |               |               |               |               |
|-----------------------------------------------------------|---------------|---------------|---------------|---------------|
| ≥ 6.26 to < 36.5                                          | 17,612 (14.5) | 29,258 (17.1) | 9,779 (23.4)  | 10,351 (23.2) |
| <b>NO<sub>2</sub> annual average (µg/m<sup>3</sup>)</b>   |               |               |               |               |
| ≥ 3.60 to < 9.52                                          | 28,640 (23.6) | 36,695 (21.4) | 6,393 (15.3)  | 6,868 (15.4)  |
| ≥ 9.52 to < 12.3                                          | 26,833 (22.1) | 36,275 (21.2) | 7,898 (18.9)  | 8,441 (18.9)  |
| ≥ 12.3 to < 14.9                                          | 24,449 (20.1) | 33,997 (19.8) | 8,110 (19.4)  | 8,701 (19.5)  |
| ≥ 14.9 to < 18.7                                          | 23,884 (19.7) | 34,896 (20.4) | 9,422 (22.5)  | 10,051 (22.5) |
| ≥ 18.7 to < 47.5                                          | 17,553 (14.5) | 29,431 (17.2) | 10,010 (23.9) | 10,605 (23.7) |
| <b>PM<sub>2.5</sub> annual average (µg/m<sup>3</sup>)</b> |               |               |               |               |
| ≥ 5.05 to < 7.76                                          | 27,660 (22.8) | 36,543 (21.3) | 7,731 (18.5)  | 8,286 (18.6)  |
| ≥ 7.76 to < 8.91                                          | 26,173 (21.6) | 35,901 (21.0) | 8,253 (19.7)  | 8,796 (19.7)  |
| ≥ 8.91 to < 9.88                                          | 26,131 (21.5) | 35,491 (20.7) | 7,743 (18.5)  | 8,338 (18.7)  |
| ≥ 9.88 to < 10.9                                          | 23,709 (19.5) | 33,929 (19.8) | 8,207 (19.6)  | 8,760 (19.6)  |
| ≥ 10.9 to < 14.4                                          | 17,684 (14.6) | 29,430 (17.2) | 9,899 (23.7)  | 10,486 (23.5) |
| <b>Care homes per 1,000 population</b>                    |               |               |               |               |
| 0                                                         | 19,457 (16.0) | 26,536 (15.5) | 6,678 (15.0)  | 7,157 (16.0)  |
| ≥ 0.040 to < 0.145                                        | 19,431 (16.0) | 27,553 (16.2) | 6,993 (16.7)  | 7,502 (16.8)  |
| ≥ 0.145 to < 0.265                                        | 24,163 (19.7) | 34,577 (20.2) | 8,732 (20.9)  | 9,282 (20.8)  |
| ≥ 0.265 to < 0.438                                        | 27,229 (22.4) | 38,375 (22.4) | 9,161 (21.9)  | 9,736 (21.8)  |
| ≥ 0.438 to < 4.23                                         | 31,078 (25.6) | 43,253 (25.8) | 10,269 (24.5) | 10,989 (24.6) |

**Extended Data Table 3. Excess death rates, percent increase in mortality and posterior probabilities for Middle Super Output Areas in England.**

|                                                                 | <b>Mean</b> | <b>Median</b> | <b>Range</b> | <b>Inter-quartile range</b> |
|-----------------------------------------------------------------|-------------|---------------|--------------|-----------------------------|
| Excess death rate (M), per 100,000 males over 40                | 206         | 182           | -248 – 1488  | 96.2 – 288                  |
| Excess death rate (F), per 100,000 females over 40              | 166         | 132           | -272 - 2550  | 55.2 - 237                  |
| Percent increase in mortality (M)                               | 51.2        | 45.0          | -36.9 – 288  | 24.7 – 70.2                 |
| Percent increase in mortality (F)                               | 42.2        | 36.3          | -41.8 - 302  | 16.4 – 61.6                 |
| Posterior probability that excess rate is greater than zero (M) | 0.872       | 0.948         | 0.032 – 1.00 | 0.819 – 0.992               |
| Posterior probability that excess rate is greater than zero (F) | 0.803       | 0.882         | 0.009 – 1.00 | 0.969 – 0.973               |

M – male; F – female.

**Extended Data Table 4. One-variable-at-a-time models for community characteristics.**

Age is included in all the models.

| Variable                            | n-tile                                 | Males |                       | Females |                       |
|-------------------------------------|----------------------------------------|-------|-----------------------|---------|-----------------------|
|                                     |                                        | Mean  | 95% credible interval | Mean    | 95% credible interval |
| <b>Population on income support</b> | 1 (lowest)                             | ref   | ref                   | ref     | ref                   |
|                                     | 2                                      | 1.05  | 1.01 – 1.08           | 0.99    | 0.96 – 1.03           |
|                                     | 3                                      | 1.10  | 1.06 – 1.13           | 1.03    | 1.00 – 1.07           |
|                                     | 4                                      | 1.15  | 1.11 – 1.18           | 1.06    | 1.02 – 1.09           |
|                                     | 5 (highest)                            | 1.21  | 1.17 – 1.25           | 1.15    | 1.11 – 1.19           |
|                                     | % of variation contributed by variable | 5.66  | 4.15 – 7.35           | 3.28    | 2.17 – 4.65           |
| <b>Population density</b>           | 1 (lowest)                             | ref   | ref                   | ref     | ref                   |
|                                     | 2                                      | 1.06  | 1.03 – 1.09           | 1.04    | 1.01 – 1.07           |
|                                     | 3                                      | 1.09  | 1.06 – 1.13           | 1.04    | 1.01 – 1.08           |
|                                     | 4                                      | 1.10  | 1.06 – 1.13           | 1.09    | 1.05 – 1.13           |
|                                     | 5 (highest)                            | 1.16  | 1.11 – 1.20           | 1.11    | 1.06 – 1.15           |
|                                     | % of variation contributed by variable | 3.20  | 1.77 – 4.90           | 1.71    | 0.784 – 2.88          |
| <b>Population non-White</b>         | 1 (lowest)                             | ref   | ref                   | ref     | ref                   |
|                                     | 2                                      | 1.04  | 1.01 – 1.07           | 1.04    | 1.01 – 1.08           |
|                                     | 3                                      | 1.06  | 1.03 – 1.10           | 1.04    | 1.01 – 1.08           |
|                                     | 4                                      | 1.12  | 1.08 – 1.16           | 1.12    | 1.08 – 1.16           |
|                                     | 5 (highest)                            | 1.26  | 1.20 – 1.31           | 1.21    | 1.15 – 1.26           |
|                                     | % of variation contributed by variable | 8.80  | 5.93 – 11.9           | 5.32    | 3.15 – 7.73           |
| <b>Overcrowded homes</b>            | 1 (lowest)                             | ref   | ref                   | ref     | ref                   |
|                                     | 2                                      | 1.04  | 1.01 – 1.07           | 1.02    | 0.99 – 1.05           |
|                                     | 3                                      | 1.08  | 1.05 – 1.12           | 1.05    | 1.02 – 1.09           |
|                                     | 4                                      | 1.15  | 1.11 – 1.18           | 1.09    | 1.06 – 1.13           |
|                                     | 5 (highest)                            | 1.26  | 1.22 – 1.31           | 1.18    | 1.14 – 1.23           |
|                                     | % of variation contributed by variable | 9.21  | 6.64 – 12.1           | 4.44    | 2.68 – 6.50           |
| <b>NO<sub>2</sub></b>               | 1 (lowest)                             | ref   | ref                   | ref     | ref                   |
|                                     | 2                                      | 1.04  | 1.01 – 1.08           | 1.04    | 1.00 – 1.07           |
|                                     | 3                                      | 1.09  | 1.05 – 1.13           | 1.04    | 1.01 – 1.08           |
|                                     | 4                                      | 1.13  | 1.09 – 1.17           | 1.11    | 1.07 – 1.16           |
|                                     | 5 (highest)                            | 1.22  | 1.16 – 1.28           | 1.17    | 1.11 – 1.23           |
|                                     | % of variation contributed by variable | 6.42  | 3.75 – 9.64           | 3.92    | 1.98 – 6.30           |
| <b>PM<sub>2.5</sub></b>             | 1 (lowest)                             | ref   | ref                   | ref     | ref                   |
|                                     | 2                                      | 1.06  | 1.02 – 1.10           | 1.04    | 1.00 – 1.08           |
|                                     | 3                                      | 1.12  | 1.07 – 1.18           | 1.06    | 1.01 – 1.12           |
|                                     | 4                                      | 1.17  | 1.10 – 1.23           | 1.10    | 1.04 – 1.16           |
|                                     | 5 (highest)                            | 1.28  | 1.20 – 1.37           | 1.19    | 1.10 – 1.27           |
|                                     | % of variation contributed by variable | 9.30  | 5.27 – 14.13          | 4.12    | 1.50 – 7.55           |

|                                               |                                           |      |             |      |             |
|-----------------------------------------------|-------------------------------------------|------|-------------|------|-------------|
| <b>Care home<br/>per 1,000<br/>population</b> | 1 (lowest)                                | ref  | ref         | ref  | ref         |
|                                               | 2                                         | 1.10 | 1.07 – 1.13 | 1.13 | 1.09 – 1.17 |
|                                               | 3                                         | 1.13 | 1.09 – 1.16 | 1.18 | 1.14 – 1.22 |
|                                               | 4                                         | 1.15 | 1.12 – 1.18 | 1.21 | 1.18 – 1.25 |
|                                               | 5 (highest)                               | 1.21 | 1.17 – 1.25 | 1.27 | 1.23 – 1.31 |
|                                               | % of variation<br>contributed by variable | 4.61 | 3.43 – 5.81 | 6.66 | 5.17 – 8.14 |

NO<sub>2</sub> – nitrogen dioxide; PM<sub>2.5</sub> – particulate matter 2.5 μ diameter

**Extended Data Table 5. Correlation between community characteristics for Middle Super Output Areas in England: Kendall's Tau coefficients between covariates (quintiles)**

|                                        | <b>Population on income support</b> | <b>Population density</b> | <b>Non-White population</b> | <b>Overcrowding</b> | <b>NO<sub>2</sub></b> | <b>PM<sub>2.5</sub></b> | <b>Care homes per 1000 population*</b> |
|----------------------------------------|-------------------------------------|---------------------------|-----------------------------|---------------------|-----------------------|-------------------------|----------------------------------------|
| <b>Population on income support</b>    | 1                                   |                           |                             |                     |                       |                         |                                        |
| <b>Population density</b>              | 0.37                                | 1                         |                             |                     |                       |                         |                                        |
| <b>Population non-White</b>            | 0.21                                | 0.56                      | 1                           |                     |                       |                         |                                        |
| <b>Overcrowding</b>                    | 0.55                                | 0.61                      | 0.61                        | 1                   |                       |                         |                                        |
| <b>NO<sub>2</sub></b>                  | 0.26                                | 0.59                      | 0.67                        | 0.56                | 1                     |                         |                                        |
| <b>PM<sub>2.5</sub></b>                | 0.04                                | 0.39                      | 0.55                        | 0.42                | 0.55                  | 1                       |                                        |
| <b>Care homes per 1000 population*</b> | -0.04                               | -0.17                     | -0.17                       | -0.16               | -0.20                 | -0.16                   | 1                                      |

\*All MSOAs with a care home density of 0 (n=1,535) are in quintile 1. Quintile 2 has reduced number of MSOAs (n=1,182)

**Extended Data Table 6. Mutually adjusted multivariable models for all MSOA characteristics. Age is included in all the models.**

| Variable                                                                 | Quintile    | Males |                       | Females |                       |
|--------------------------------------------------------------------------|-------------|-------|-----------------------|---------|-----------------------|
|                                                                          |             | Mean  | 95% credible interval | Mean    | 95% credible interval |
| <b>Population on income support</b>                                      | 1 (lowest)  | ref   | ref                   | ref     | ref                   |
|                                                                          | 2           | 1.02  | 0.99 – 1.05           | 0.97    | 0.94 – 1.01           |
|                                                                          | 3           | 1.04  | 1.01 – 1.08           | 0.99    | 0.95 – 1.03           |
|                                                                          | 4           | 1.07  | 1.03 – 1.12           | 1.01    | 0.96 – 1.05           |
|                                                                          | 5 (highest) | 1.10  | 1.05 – 1.16           | 1.08    | 1.02 – 1.13           |
| <b>Population density</b>                                                | 1 (lowest)  | ref   | ref                   | ref     | ref                   |
|                                                                          | 2           | 1.02  | 0.97 – 1.04           | 1.01    | 0.97 – 1.04           |
|                                                                          | 3           | 1.01  | 0.98 – 1.05           | 0.99    | 0.95 – 1.03           |
|                                                                          | 4           | 0.99  | 0.95 – 1.04           | 1.02    | 0.97 – 1.06           |
|                                                                          | 5 (highest) | 0.99  | 0.95 – 1.04           | 1.00    | 0.94 – 1.05           |
| <b>Population non-White</b>                                              | 1 (lowest)  | ref   | ref                   | ref     | ref                   |
|                                                                          | 2           | 1.01  | 0.98 – 1.04           | 1.03    | 0.99 – 1.06           |
|                                                                          | 3           | 1.02  | 0.98 – 1.06           | 1.02    | 0.98 – 1.06           |
|                                                                          | 4           | 1.04  | 0.99 – 1.08           | 1.06    | 1.01 – 1.12           |
|                                                                          | 5 (highest) | 1.08  | 1.02 – 1.15           | 1.09    | 1.02 – 1.17           |
| <b>Overcrowded homes</b>                                                 | 1 (lowest)  | ref   | ref                   | ref     | ref                   |
|                                                                          | 2           | 1.01  | 0.98 – 1.05           | 1.01    | 0.98 – 1.04           |
|                                                                          | 3           | 1.02  | 0.99 – 1.06           | 1.01    | 0.97 – 1.06           |
|                                                                          | 4           | 1.06  | 1.01 – 1.11           | 1.02    | 0.97 – 1.07           |
|                                                                          | 5 (highest) | 1.12  | 1.04 – 1.19           | 1.06    | 0.99 – 1.14           |
| <b>NO<sub>2</sub></b>                                                    | 1 (lowest)  | ref   | ref                   | ref     | ref                   |
|                                                                          | 2           | 1.01  | 0.97 – 1.04           | 1.02    | 0.98 – 1.06           |
|                                                                          | 3           | 1.02  | 0.98 – 1.07           | 1.01    | 0.96 – 1.06           |
|                                                                          | 4           | 1.01  | 0.95 – 1.06           | 1.04    | 0.98 – 1.10           |
|                                                                          | 5 (highest) | 1.02  | 0.95 – 1.10           | 1.05    | 0.98 – 1.13           |
| <b>PM<sub>2.5</sub></b>                                                  | 1 (lowest)  | ref   | ref                   | ref     | ref                   |
|                                                                          | 2           | 1.00  | 0.96 – 1.05           | 0.99    | 0.95 – 1.04           |
|                                                                          | 3           | 1.03  | 0.97 – 1.09           | 0.98    | 0.92 – 1.04           |
|                                                                          | 4           | 1.02  | 0.95 – 1.09           | 0.98    | 0.91 – 1.05           |
|                                                                          | 5 (highest) | 1.07  | 0.98 – 1.17           | 1.02    | 0.93 – 1.11           |
| <b>Care homes per 1,000 population</b>                                   | 1 (lowest)  | ref   | ref                   | ref     | ref                   |
|                                                                          | 2           | 1.09  | 1.06 – 1.12           | 1.12    | 1.09 – 1.16           |
|                                                                          | 3           | 1.13  | 1.10 – 1.17           | 1.19    | 1.15 – 1.22           |
|                                                                          | 4           | 1.15  | 1.12 – 1.19           | 1.22    | 1.19 – 1.26           |
|                                                                          | 5 (highest) | 1.22  | 1.19 – 1.26           | 1.27    | 1.23 – 1.31           |
| % of variation contributed by all variables                              |             | 17.6  | 13.9 – 21.9           | 14.9    | 12.1 – 18.2           |
| % of variance explained by local clustering for model with all variables |             | 30.8  | 28.6 – 32.9           | 18.4    | 17.2 – 20.1           |
| % of variance explained by local clustering for model with no variables  |             | 39.0  | 38.6 – 41.1           | 21.9    | 20.8 – 23.1           |



**Extended Data Table 7. Mutually adjusted multivariable models for all MSOA characteristics, results of sensitivity analyses.** Age is included in all the models.

**a) Penalised complexity prior.**

| Variable                                    | Quintile    | Males |                       | Females |                       |
|---------------------------------------------|-------------|-------|-----------------------|---------|-----------------------|
|                                             |             | Mean  | 95% credible interval | Mean    | 95% credible interval |
| <b>Population on income support</b>         | 1 (lowest)  | ref   | ref                   | ref     | ref                   |
|                                             | 2           | 1.02  | 0.99 – 1.05           | 0.97    | 0.94 – 1.01           |
|                                             | 3           | 1.04  | 1.00 – 1.08           | 0.99    | 0.95 – 1.03           |
|                                             | 4           | 1.07  | 1.02 – 1.11           | 1.00    | 0.96 – 1.05           |
|                                             | 5 (highest) | 1.10  | 1.05 – 1.15           | 1.07    | 1.02 – 1.13           |
| <b>Population density</b>                   | 1 (lowest)  | ref   | ref                   | ref     | ref                   |
|                                             | 2           | 1.02  | 0.97 – 1.04           | 1.01    | 0.97 – 1.04           |
|                                             | 3           | 1.01  | 0.98 – 1.05           | 0.99    | 0.95 – 1.03           |
|                                             | 4           | 0.99  | 0.95 – 1.04           | 1.02    | 0.97 – 1.06           |
|                                             | 5 (highest) | 0.99  | 0.95 – 1.04           | 0.99    | 0.94 – 1.05           |
| <b>Population non-White</b>                 | 1 (lowest)  | ref   | ref                   | ref     | ref                   |
|                                             | 2           | 1.01  | 0.98 – 1.05           | 1.03    | 1.00 – 1.06           |
|                                             | 3           | 1.02  | 0.99 – 1.06           | 1.02    | 0.98 – 1.06           |
|                                             | 4           | 1.04  | 0.99 – 1.09           | 1.07    | 1.01 – 1.12           |
|                                             | 5 (highest) | 1.09  | 1.02 – 1.15           | 1.10    | 1.03 – 1.17           |
| <b>Overcrowded homes</b>                    | 1 (lowest)  | ref   | ref                   | ref     | ref                   |
|                                             | 2           | 1.01  | 0.98 – 1.05           | 1.01    | 0.98 – 1.04           |
|                                             | 3           | 1.02  | 0.99 – 1.06           | 1.02    | 0.97 – 1.06           |
|                                             | 4           | 1.06  | 1.01 – 1.11           | 1.02    | 0.97 – 1.08           |
|                                             | 5 (highest) | 1.12  | 1.04 – 1.19           | 1.06    | 0.99 – 1.14           |
| <b>NO<sub>2</sub></b>                       | 1 (lowest)  | ref   | ref                   | ref     | ref                   |
|                                             | 2           | 1.01  | 0.97 – 1.04           | 1.02    | 0.98 – 1.06           |
|                                             | 3           | 1.02  | 0.98 – 1.07           | 1.01    | 0.96 – 1.06           |
|                                             | 4           | 1.01  | 0.95 – 1.06           | 1.04    | 0.98 – 1.10           |
|                                             | 5 (highest) | 1.02  | 0.95 – 1.10           | 1.06    | 0.98 – 1.13           |
| <b>PM<sub>2.5</sub></b>                     | 1 (lowest)  | ref   | ref                   | ref     | ref                   |
|                                             | 2           | 1.00  | 0.96 – 1.05           | 1.00    | 0.95 – 1.04           |
|                                             | 3           | 1.03  | 0.97 – 1.09           | 0.98    | 0.93 – 1.04           |
|                                             | 4           | 1.02  | 0.95 – 1.10           | 0.99    | 0.92 – 1.06           |
|                                             | 5 (highest) | 1.07  | 0.98 – 1.17           | 1.03    | 0.93 – 1.12           |
| <b>Care homes per 1,000 population</b>      | 1 (lowest)  | ref   | ref                   | ref     | ref                   |
|                                             | 2           | 1.09  | 1.06 – 1.12           | 1.12    | 1.09 – 1.16           |
|                                             | 3           | 1.13  | 1.10 – 1.17           | 1.19    | 1.15 – 1.22           |
|                                             | 4           | 1.15  | 1.12 – 1.19           | 1.22    | 1.18 – 1.26           |
|                                             | 5 (highest) | 1.22  | 1.19 – 1.26           | 1.27    | 1.23 – 1.31           |
| % of variation contributed by all variables |             | 17.9  | 14.1 – 22.3           | 15.3    | 12.4 – 18.5           |

b) Priors on the hyperparameters  $\tau_v$  and  $\tau_u$ :  $\log\text{Gamma}(0.5, 0.05)$ .

| Variable                                    | Quintile    | Males |                       | Females |                       |
|---------------------------------------------|-------------|-------|-----------------------|---------|-----------------------|
|                                             |             | Mean  | 95% credible interval | Mean    | 95% credible interval |
| <b>Population on income support</b>         | 1 (lowest)  | ref   | ref                   | ref     | ref                   |
|                                             | 2           | 1.02  | 0.99 – 1.05           | 0.97    | 0.94 – 1.00           |
|                                             | 3           | 1.04  | 1.01 – 1.08           | 0.99    | 0.95 – 1.03           |
|                                             | 4           | 1.07  | 1.03 – 1.11           | 1.01    | 0.96 – 1.05           |
|                                             | 5 (highest) | 1.10  | 1.05 – 1.16           | 1.08    | 1.02 – 1.13           |
| <b>Population density</b>                   | 1 (lowest)  | ref   | ref                   | ref     | ref                   |
|                                             | 2           | 1.02  | 0.99 – 1.06           | 1.01    | 0.97 – 1.04           |
|                                             | 3           | 1.01  | 0.98 – 1.05           | 0.99    | 0.95 – 1.03           |
|                                             | 4           | 0.99  | 0.95 – 1.03           | 1.02    | 0.97 – 1.06           |
|                                             | 5 (highest) | 1.00  | 0.95 – 1.05           | 0.99    | 0.94 – 1.04           |
| <b>Population non-White</b>                 | 1 (lowest)  | ref   | ref                   | ref     | ref                   |
|                                             | 2           | 1.01  | 0.98 – 1.04           | 1.03    | 1.00 – 1.06           |
|                                             | 3           | 1.02  | 0.98 – 1.06           | 1.02    | 0.98 – 1.06           |
|                                             | 4           | 1.03  | 0.99 – 1.08           | 1.07    | 1.02 – 1.12           |
|                                             | 5 (highest) | 1.08  | 1.02 – 1.15           | 1.10    | 1.03 – 1.17           |
| <b>Overcrowded homes</b>                    | 1 (lowest)  | ref   | ref                   | ref     | ref                   |
|                                             | 2           | 1.01  | 0.98 – 1.05           | 1.01    | 0.98 – 1.04           |
|                                             | 3           | 1.02  | 0.98 – 1.06           | 1.01    | 0.97 – 1.05           |
|                                             | 4           | 1.06  | 1.01 – 1.11           | 1.02    | 0.97 – 1.08           |
|                                             | 5 (highest) | 1.11  | 1.04 – 1.19           | 1.06    | 0.99 – 1.13           |
| <b>NO<sub>2</sub></b>                       | 1 (lowest)  | ref   | ref                   | ref     | ref                   |
|                                             | 2           | 1.01  | 0.97 – 1.05           | 1.02    | 0.98 – 1.06           |
|                                             | 3           | 1.02  | 0.98 – 1.07           | 1.01    | 0.96 – 1.06           |
|                                             | 4           | 1.01  | 0.95 – 1.07           | 1.04    | 0.98 – 1.10           |
|                                             | 5 (highest) | 1.03  | 0.96 – 1.10           | 1.05    | 0.98 – 1.13           |
| <b>PM<sub>2.5</sub></b>                     | 1 (lowest)  | ref   | ref                   | ref     | ref                   |
|                                             | 2           | 1.00  | 0.96 – 1.05           | 1.00    | 0.95 – 1.04           |
|                                             | 3           | 1.03  | 0.97 – 1.09           | 0.98    | 0.92 – 1.04           |
|                                             | 4           | 1.02  | 0.95 – 1.09           | 0.98    | 0.91 – 1.06           |
|                                             | 5 (highest) | 1.07  | 0.98 – 1.17           | 1.02    | 0.93 – 1.12           |
| <b>Care homes per 1,000 population</b>      | 1 (lowest)  | ref   | ref                   | ref     | ref                   |
|                                             | 2           | 1.09  | 1.06 – 1.12           | 1.12    | 1.09 – 1.16           |
|                                             | 3           | 1.13  | 1.10 – 1.17           | 1.19    | 1.15 – 1.23           |
|                                             | 4           | 1.15  | 1.12 – 1.19           | 1.22    | 1.18 – 1.27           |
|                                             | 5 (highest) | 1.22  | 1.19 – 1.26           | 1.27    | 1.23 – 1.32           |
| % of variation contributed by all variables |             | 17.6  | 13.9 – 22.0           | 15.0    | 12.0 – 18.1           |

c) Excluding care homes per 1,000 population.

| Variables                                          | Quintile    | Males |                       | Females |                       |
|----------------------------------------------------|-------------|-------|-----------------------|---------|-----------------------|
|                                                    |             | Mean  | 95% credible interval | Mean    | 95% credible interval |
| <b>Population on income support</b>                | 1 (lowest)  | ref   | ref                   | ref     | ref                   |
|                                                    | 2           | 1.03  | 1.00 – 1.06           | 0.98    | 0.95 – 1.02           |
|                                                    | 3           | 1.06  | 1.02 – 1.10           | 1.01    | 0.97 – 1.05           |
|                                                    | 4           | 1.09  | 1.04 – 1.13           | 1.02    | 0.98 – 1.07           |
|                                                    | 5 (highest) | 1.12  | 1.07 – 1.18           | 1.10    | 1.04 – 1.16           |
| <b>Population density</b>                          | 1 (lowest)  | ref   | ref                   | ref     | ref                   |
|                                                    | 2           | 1.02  | 0.99 – 1.05           | 1.01    | 0.97 – 1.05           |
|                                                    | 3           | 1.01  | 0.97 – 1.05           | 0.99    | 0.95 – 1.03           |
|                                                    | 4           | 0.98  | 0.94 – 1.02           | 1.01    | 0.96 – 1.05           |
|                                                    | 5 (highest) | 0.99  | 0.94 – 1.03           | 0.98    | 0.93 – 1.03           |
| <b>Population non-White</b>                        | 1 (lowest)  | ref   | ref                   | ref     | ref                   |
|                                                    | 2           | 1.02  | 0.99 – 1.05           | 1.04    | 1.00 – 1.07           |
|                                                    | 3           | 1.03  | 0.99 – 1.07           | 1.03    | 0.99 – 1.07           |
|                                                    | 4           | 1.05  | 1.00 – 1.10           | 1.08    | 1.03 – 1.13           |
|                                                    | 5 (highest) | 1.11  | 1.04 – 1.18           | 1.12    | 1.05 – 1.19           |
| <b>Overcrowded homes</b>                           | 1 (lowest)  | ref   | ref                   | ref     | ref                   |
|                                                    | 2           | 1.01  | 0.98 – 1.05           | 1.01    | 0.97 – 1.04           |
|                                                    | 3           | 1.02  | 0.98 – 1.06           | 1.01    | 0.97 – 1.05           |
|                                                    | 4           | 1.05  | 1.00 – 1.10           | 1.01    | 0.96 – 1.06           |
|                                                    | 5 (highest) | 1.09  | 1.02 – 1.16           | 1.03    | 0.96 – 1.11           |
| <b>NO<sub>2</sub></b>                              | 1 (lowest)  | ref   | ref                   | ref     | ref                   |
|                                                    | 2           | 1.01  | 0.97 – 1.04           | 1.02    | 0.98 – 1.06           |
|                                                    | 3           | 1.01  | 0.97 – 1.06           | 1.00    | 0.95 – 1.05           |
|                                                    | 4           | 1.01  | 0.95 – 1.07           | 1.04    | 0.98 – 1.10           |
|                                                    | 5 (highest) | 1.02  | 0.95 – 1.10           | 1.04    | 0.97 – 1.12           |
| <b>PM<sub>2.5</sub></b>                            | 1 (lowest)  | ref   | ref                   | ref     | ref                   |
|                                                    | 2           | 1.00  | 0.96 – 1.04           | 0.99    | 0.95 – 1.04           |
|                                                    | 3           | 1.02  | 0.96 – 1.07           | 0.97    | 0.91 – 1.02           |
|                                                    | 4           | 1.00  | 0.93 – 1.07           | 0.96    | 0.91 – 1.02           |
|                                                    | 5 (highest) | 1.04  | 0.95 – 1.13           | 0.98    | 0.90 – 1.08           |
| <b>% of variation contributed by all variables</b> |             | 12.7  | 9.12 – 16.9           | 8.00    | 5.53 – 11.0           |

**d) Excluding care homes per 1,000 population and deaths in care homes.**

| Covariate                                   | Quintile    | Males |                       | Females |                       |
|---------------------------------------------|-------------|-------|-----------------------|---------|-----------------------|
|                                             |             | Mean  | 95% credible interval | Mean    | 95% credible interval |
| <b>Population on income support</b>         | 1 (lowest)  | ref   | ref                   | ref     | ref                   |
|                                             | 2           | 1.05  | 1.02 – 1.09           | 1.02    | 0.99 – 1.06           |
|                                             | 3           | 1.09  | 1.05 – 1.13           | 1.08    | 1.04 – 1.12           |
|                                             | 4           | 1.12  | 1.07 – 1.17           | 1.13    | 1.08 – 1.18           |
|                                             | 5 (highest) | 1.19  | 1.13 – 1.25           | 1.24    | 1.17 – 1.30           |
| <b>Population density</b>                   | 1 (lowest)  | ref   | ref                   | ref     | ref                   |
|                                             | 2           | 1.01  | 0.98 – 1.05           | 1.02    | 0.99 – 1.06           |
|                                             | 3           | 1.01  | 0.97 – 1.05           | 1.01    | 0.97 – 1.05           |
|                                             | 4           | 0.97  | 0.93 – 1.01           | 1.02    | 0.98 – 1.07           |
|                                             | 5 (highest) | 0.97  | 0.92 – 1.02           | 0.99    | 0.94 – 1.04           |
| <b>Population non-White</b>                 | 1 (lowest)  | ref   | ref                   | ref     | ref                   |
|                                             | 2           | 1.00  | 0.97 – 1.03           | 1.01    | 0.98 – 1.05           |
|                                             | 3           | 0.99  | 0.95 – 1.03           | 0.97    | 0.94 – 1.02           |
|                                             | 4           | 0.99  | 0.94 – 1.04           | 1.03    | 0.98 – 1.09           |
|                                             | 5 (highest) | 1.06  | 1.00 – 1.13           | 1.05    | 0.98 – 1.12           |
| <b>Overcrowded homes</b>                    | 1 (lowest)  | ref   | ref                   | ref     | ref                   |
|                                             | 2           | 1.01  | 0.98 – 1.05           | 1.02    | 0.98 – 1.06           |
|                                             | 3           | 1.03  | 0.98 – 1.07           | 1.00    | 0.96 – 1.04           |
|                                             | 4           | 1.06  | 1.01 – 1.11           | 1.02    | 0.97 – 1.07           |
|                                             | 5 (highest) | 1.10  | 1.03 – 1.18           | 1.07    | 1.00 – 1.15           |
| <b>NO<sub>2</sub></b>                       | 1 (lowest)  | ref   | ref                   | ref     | ref                   |
|                                             | 2           | 1.01  | 0.97 – 1.05           | 0.99    | 0.95 – 1.03           |
|                                             | 3           | 1.02  | 0.97 – 1.07           | 0.98    | 0.93 – 1.03           |
|                                             | 4           | 1.01  | 0.96 – 1.07           | 1.00    | 0.94 – 1.07           |
|                                             | 5 (highest) | 1.05  | 0.98 – 1.13           | 1.03    | 0.95 – 1.11           |
| <b>PM<sub>2.5</sub></b>                     | 1 (lowest)  | ref   | ref                   | ref     | ref                   |
|                                             | 2           | 1.00  | 0.96 – 1.05           | 0.99    | 0.94 – 1.03           |
|                                             | 3           | 1.02  | 0.96 – 1.08           | 0.96    | 0.90 – 1.02           |
|                                             | 4           | 1.02  | 0.95 – 1.10           | 0.96    | 0.89 – 1.04           |
|                                             | 5 (highest) | 1.05  | 0.96 – 1.16           | 0.98    | 0.89 – 1.08           |
| % of variation contributed by all variables |             | 20.0  | 15.1 – 25.7           | 24.0    | 18.5 – 30.0           |

e) Both sexes combined.

| <b>Variables</b>                                   | <b>Quintile</b> | <b>Mean</b> | <b>95% credible interval</b> |
|----------------------------------------------------|-----------------|-------------|------------------------------|
| <b>Population on income support</b>                | 1 (lowest)      | ref         | ref                          |
|                                                    | 2               | 0.99        | 0.97 – 1.02                  |
|                                                    | 3               | 1.01        | 0.98 – 1.04                  |
|                                                    | 4               | 1.02        | 0.99 – 1.06                  |
|                                                    | 5 (highest)     | 1.06        | 1.02 – 1.10                  |
| <b>Population density</b>                          | 1 (lowest)      | ref         | ref                          |
|                                                    | 2               | 1.01        | 0.99 – 1.04                  |
|                                                    | 3               | 1.00        | 0.97 – 1.03                  |
|                                                    | 4               | 1.01        | 0.97 – 1.04                  |
|                                                    | 5 (highest)     | 1.00        | 0.96 – 1.04                  |
| <b>Population non-White</b>                        | 1 (lowest)      | ref         | ref                          |
|                                                    | 2               | 1.02        | 0.99 – 1.04                  |
|                                                    | 3               | 1.02        | 0.98 – 1.05                  |
|                                                    | 4               | 1.05        | 1.01 – 1.09                  |
|                                                    | 5 (highest)     | 1.09        | 1.04 – 1.15                  |
| <b>Overcrowded homes</b>                           | 1 (lowest)      | ref         | ref                          |
|                                                    | 2               | 1.01        | 0.98 – 1.03                  |
|                                                    | 3               | 1.00        | 0.97 – 1.04                  |
|                                                    | 4               | 1.02        | 0.98 – 1.06                  |
|                                                    | 5 (highest)     | 1.05        | 0.99 – 1.11                  |
| <b>NO<sub>2</sub></b>                              | 1 (lowest)      | ref         | ref                          |
|                                                    | 2               | 1.01        | 0.98 – 1.04                  |
|                                                    | 3               | 1.01        | 0.98 – 1.05                  |
|                                                    | 4               | 1.02        | 0.97 – 1.07                  |
|                                                    | 5 (highest)     | 1.04        | 0.98 – 1.10                  |
| <b>PM<sub>2.5</sub></b>                            | 1 (lowest)      | ref         | ref                          |
|                                                    | 2               | 1.00        | 0.96 – 1.03                  |
|                                                    | 3               | 1.00        | 0.95 – 1.05                  |
|                                                    | 4               | 0.99        | 0.94 – 1.06                  |
|                                                    | 5 (highest)     | 1.04        | 0.96 – 1.11                  |
| <b>Care homes per 1,000 population</b>             | 1 (lowest)      | ref         | ref                          |
|                                                    | 2               | 1.09        | 1.07 – 1.12                  |
|                                                    | 3               | 1.14        | 1.11 – 1.16                  |
|                                                    | 4               | 1.16        | 1.13 – 1.19                  |
|                                                    | 5 (highest)     | 1.21        | 1.18 – 1.24                  |
| <b>% of variation contributed by all variables</b> |                 | 13.7        | 11.0 – 16.7                  |

**Extended Data Fig. 1. Scatter plot showing male vs female percent increase in deaths age 40 and over for 6,701 Middle Super Output Areas in England. Spearman's rank correlation coefficient 0.43**

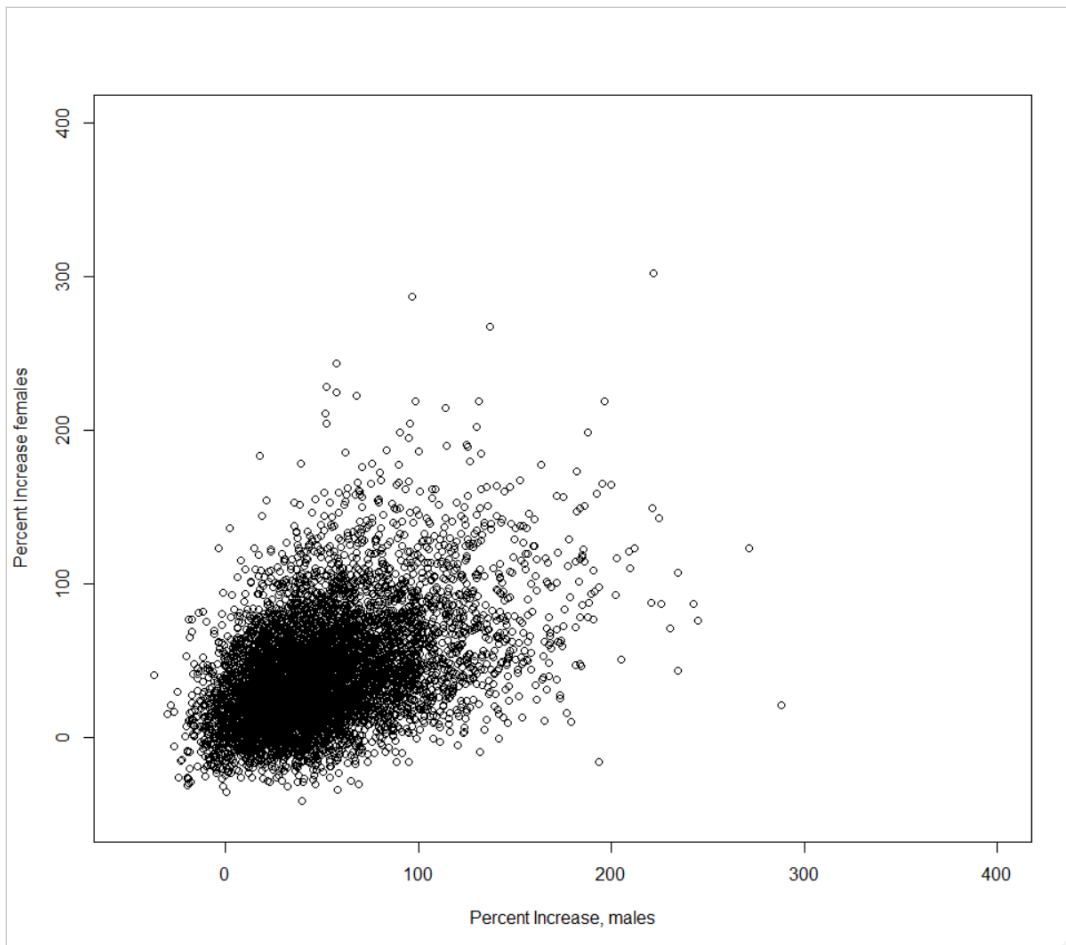

**Extended Data Fig. 2. Scatter plot showing male vs female excess mortality rate per 100,000 males/females age 40 and over for 6,701 Middle Super Output Areas in England. Spearman's rank correlation coefficient 0.45**

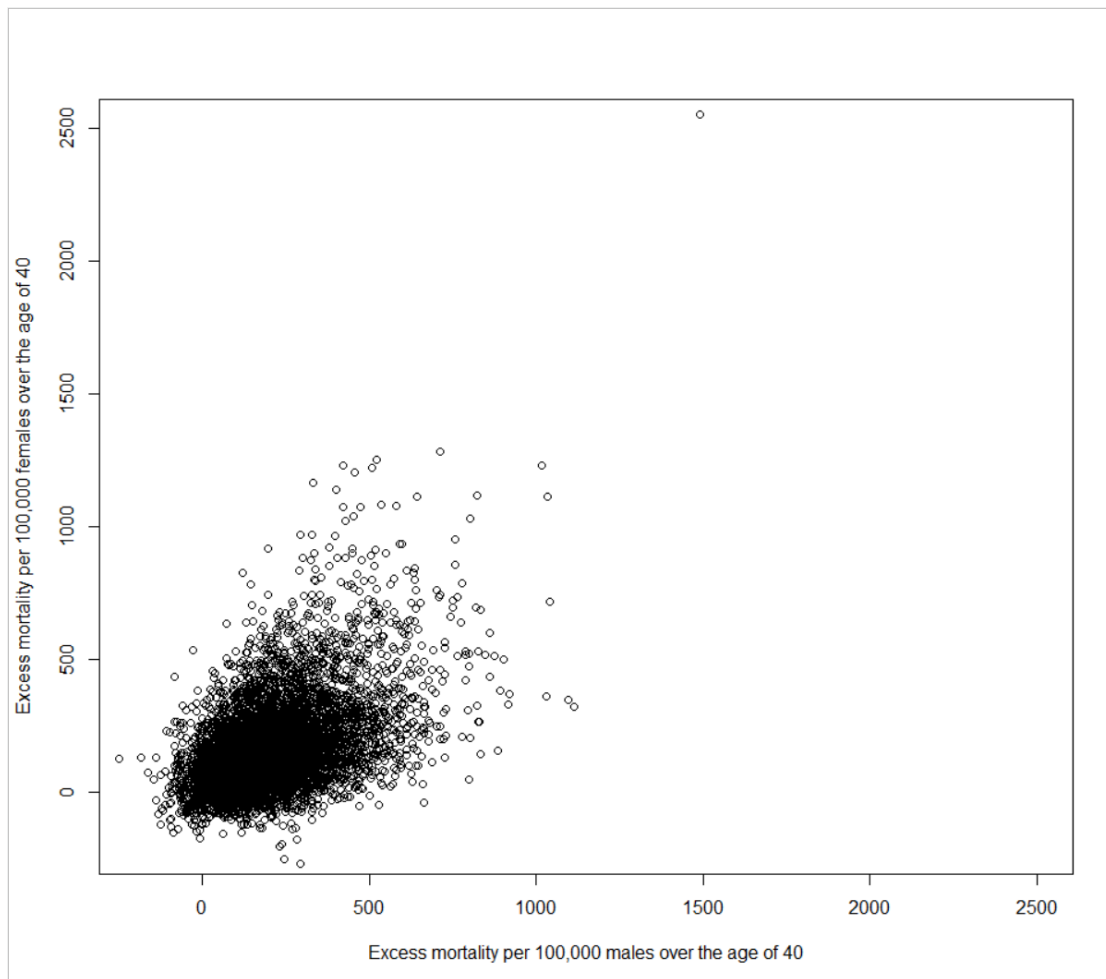

Supplement: Supplementary file [file media-1.pdf]
